# Supplementary material for: Engineering Bacillus pumilus alkaline serine protease to increase its low-temperature proteolytic activity by directed evolution
Source: PubMed Central journal article supplement (PMC5984802; doi:10.1186/s12896-018-0451-0), 2018-06-01
Supplement: 12896_2018_451_MOESM3_ESM.pdf [file 12896_2018_451_MOESM3_ESM.pdf]

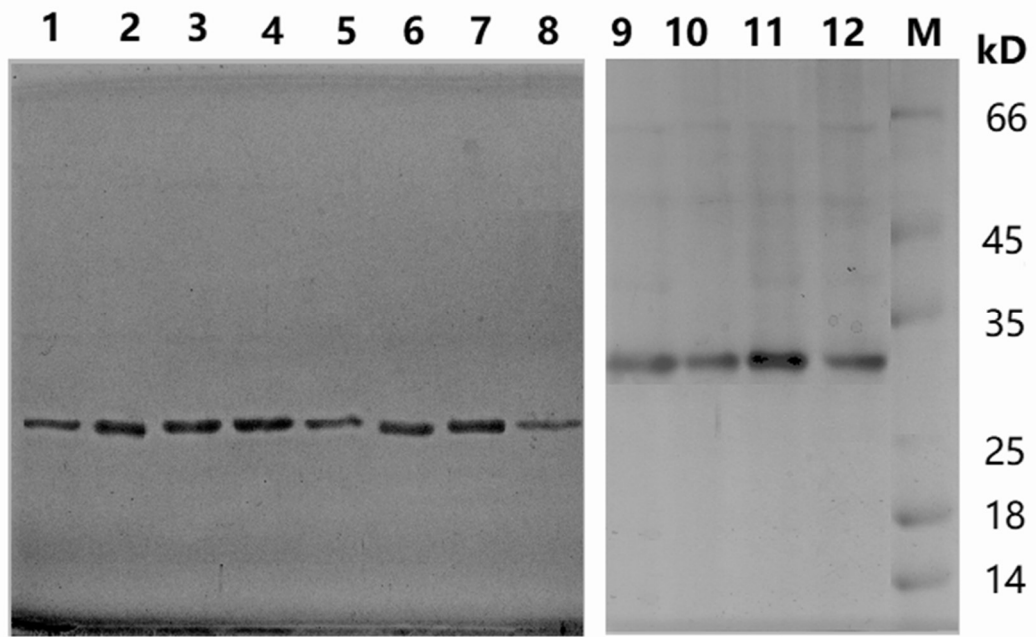

**Fig. S1.** SDS-PAGE analysis of the wt and variants of the alkaline protease (DHAP). Lane 1-12 represents the wt, P9S, A38V, A116T, T162I, S182R, T243S, A1G/K27K, P9S/K27Q, P9S/T162I, K27Q/T162I, and P9S/K27Q/T162I.
